# Supplementary material
Source: publisher figshare collection journal article supplement (https://karger.figshare.com/articles/dataset/_/11317118)
Supplement: Supplementary file 1 [file 1 › NEN502825_sm2.docx]

**Supplementary Table 1.** Grade 3 and 4 toxicities according to the NCI-CTCAE v4, for the 43 patients treated with chemotherapy (all protocols)

| Description | Grade 3 | Grade 4 | Total |
| --- | --- | --- | --- |
| Nausea +/- Vomiting | 2 | 0 | 2 |
| Diarrhoea | 0 | 0 | 0 |
| Mucositis | 0 | 0 | 0 |
| Neuropathy | 2 | 1 | 3 |
| Anaemia | 2 | 0 | 2 |
| Neutropenia | 4 | 3 | 7 |
| Thrombocytopenia | 0 | 0 | 0 |
| Acute kidney failure | 0 | 0 | 0 |
| Infection | 2 | 0 | 2 |
| Total | 12 | 4 | 16 |
