# Supplementary material
Source: publisher figshare collection journal article supplement (https://karger.figshare.com/articles/dataset/_/11317118)

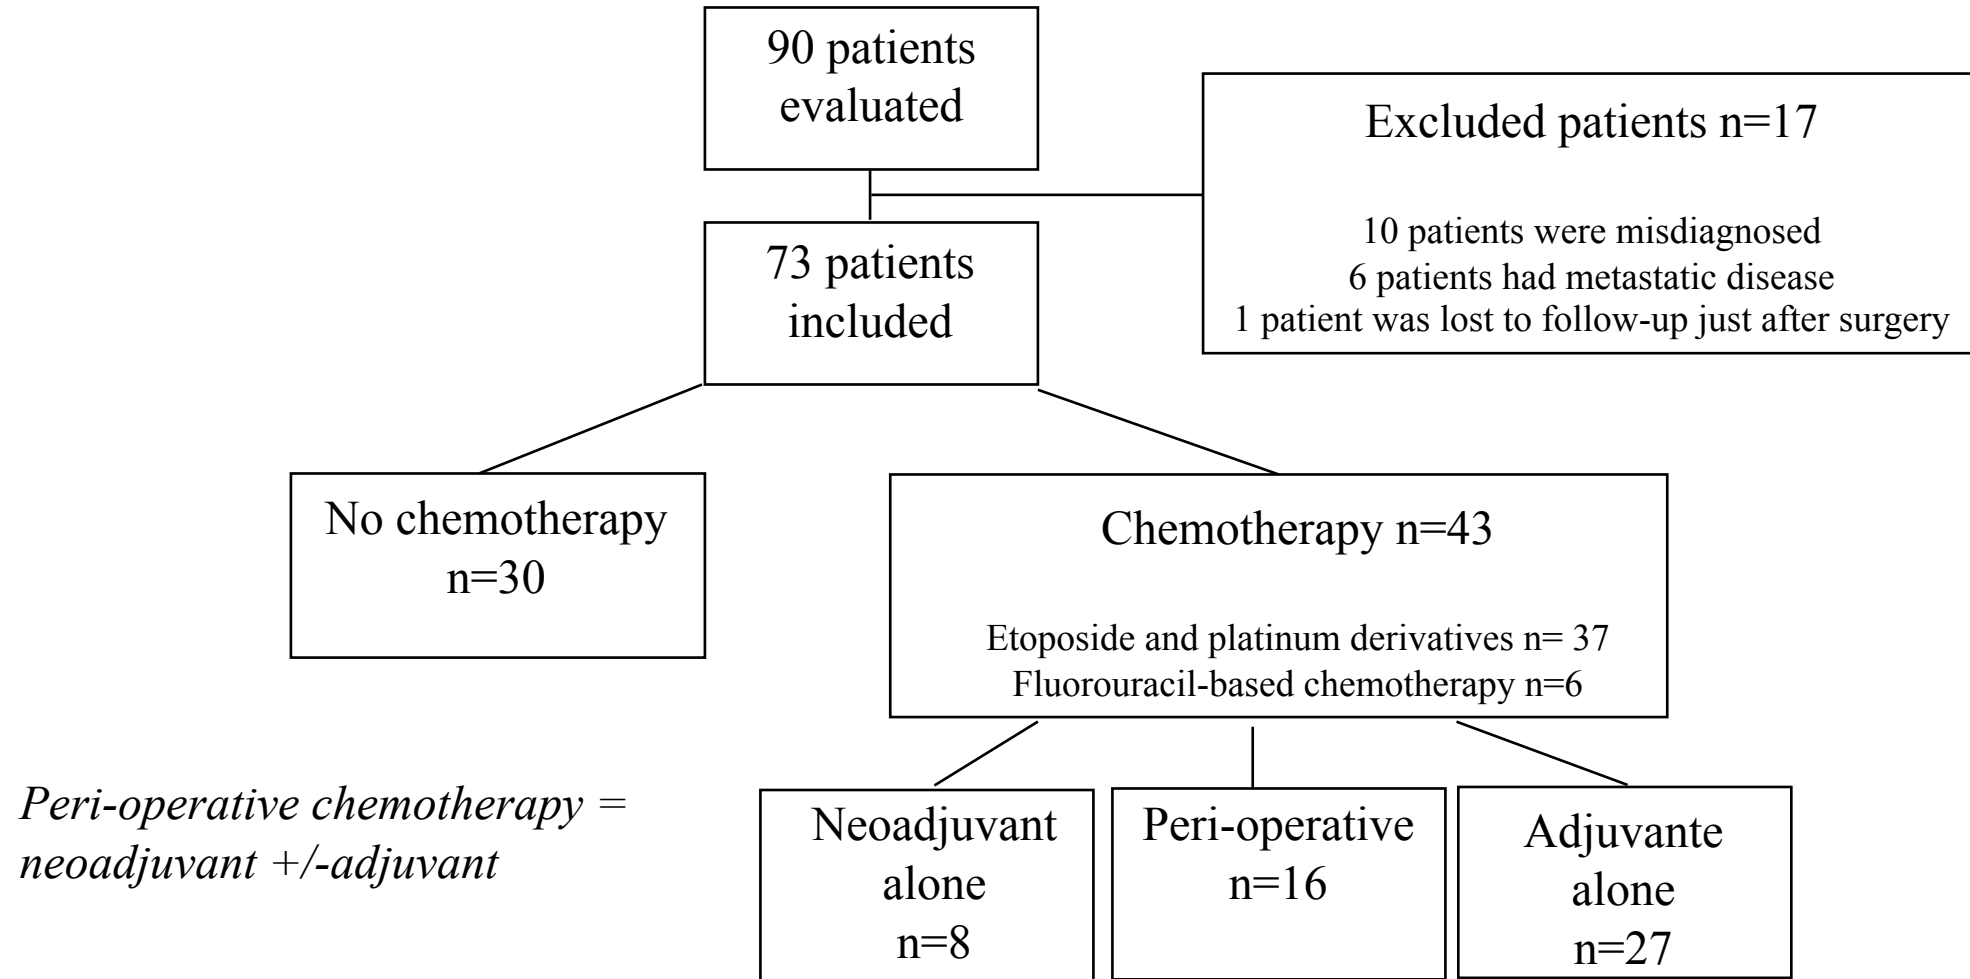

**Supplementary figure.**

Supplement: Supplementary file 1 [file 1 › NEN502825_sm1.pdf]
